# Supplementary material for: Long-Term Correlation between Influenza Vaccination Coverage and Incidence of Influenza-Like Illness in 14 European Countries
Source: PubMed Central journal article supplement (PMC5042488; doi:10.1371/journal.pone.0163508), 2016-09-29
Supplement: pone.0163508.s002.pdf [file pone.0163508.s002.pdf]

**S2 Table.** Influenza vaccination coverage for the elderly population (age  $\geq 65$  or  $\geq 60$ , depending on country) of European countries

| Season    | Influenza vaccination coverage (percentages) |                    |                    |                      |                      |                    |                    |                   |                    |                    |                    |                    |                       |                    |
|-----------|----------------------------------------------|--------------------|--------------------|----------------------|----------------------|--------------------|--------------------|-------------------|--------------------|--------------------|--------------------|--------------------|-----------------------|--------------------|
|           | Denmark                                      | England            | France             | Germany <sup>a</sup> | Hungary <sup>a</sup> | Ireland            | Italy              | Latvia            | Lithuania          | the Netherlands    | Portugal           | Romania            | Slovakia <sup>a</sup> | Spain              |
| 1990/1991 |                                              | 42 <sup>[30]</sup> |                    |                      |                      |                    | 18 <sup>[43]</sup> |                   |                    |                    |                    |                    |                       |                    |
| 1991/1992 |                                              | 46 <sup>[30]</sup> |                    |                      |                      |                    | 22 <sup>[43]</sup> |                   |                    | 28 <sup>[23]</sup> |                    |                    |                       |                    |
| 1992/1993 |                                              | 46 <sup>[30]</sup> |                    |                      |                      |                    | 26 <sup>[43]</sup> |                   |                    | 31 <sup>[23]</sup> |                    |                    |                       |                    |
| 1993/1994 |                                              | 52 <sup>[30]</sup> |                    |                      |                      |                    | 29 <sup>[43]</sup> |                   |                    | 38 <sup>[23]</sup> |                    |                    |                       |                    |
| 1994/1995 |                                              | 54 <sup>[30]</sup> |                    |                      |                      |                    | 32 <sup>[43]</sup> |                   |                    | 40 <sup>[23]</sup> |                    |                    |                       |                    |
| 1995/1996 |                                              | 55 <sup>[30]</sup> |                    |                      |                      |                    | 35 <sup>[43]</sup> |                   |                    | 43 <sup>[23]</sup> |                    |                    |                       |                    |
| 1996/1997 |                                              | 54 <sup>[30]</sup> |                    |                      |                      |                    | 38 <sup>[43]</sup> |                   |                    | 76 <sup>[23]</sup> |                    | 8 <sup>f</sup>     |                       | 63 <sup>[33]</sup> |
| 1997/1998 |                                              | 59 <sup>[30]</sup> |                    |                      |                      |                    | 41 <sup>[43]</sup> |                   |                    | 79 <sup>[25]</sup> |                    | 10 <sup>f</sup>    |                       | 67 <sup>[33]</sup> |
| 1998/1999 |                                              | 49 <sup>[30]</sup> |                    |                      |                      |                    | 49 <sup>[43]</sup> |                   |                    | 80 <sup>[47]</sup> | 31 <sup>[37]</sup> | 15 <sup>f</sup>    |                       | 64 <sup>[33]</sup> |
| 1999/2000 |                                              | 53 <sup>[30]</sup> |                    |                      |                      |                    | 41 <sup>[34]</sup> |                   |                    | 81 <sup>[47]</sup> | 39 <sup>[37]</sup> | 15 <sup>f</sup>    |                       | 60 <sup>[33]</sup> |
| 2000/2001 | 46 <sup>[31]</sup>                           | 65 <sup>[17]</sup> | 65 <sup>[36]</sup> | 31 <sup>[31]</sup>   | 31 <sup>b</sup>      |                    | 51 <sup>[34]</sup> |                   |                    | 81 <sup>[47]</sup> | 39 <sup>[31]</sup> | 17 <sup>f</sup>    | 21 <sup>[36]</sup>    | 62 <sup>[32]</sup> |
| 2001/2002 |                                              | 68 <sup>[17]</sup> | 65 <sup>[36]</sup> | 49 <sup>[24]</sup>   | 33 <sup>b</sup>      |                    | 55 <sup>[34]</sup> |                   |                    | 81 <sup>[47]</sup> | 42 <sup>[37]</sup> | 17 <sup>f</sup>    | 32 <sup>[36]</sup>    | 62 <sup>[32]</sup> |
| 2002/2003 | 30 <sup>[45]</sup>                           | 69 <sup>[17]</sup> | 67 <sup>[36]</sup> | 46 <sup>[24]</sup>   | 37 <sup>b</sup>      |                    | 60 <sup>[34]</sup> |                   |                    | 81 <sup>[47]</sup> | 37 <sup>[37]</sup> | 18 <sup>f</sup>    |                       | 67 <sup>[32]</sup> |
| 2003/2004 | 47 <sup>[45]</sup>                           | 71 <sup>[17]</sup> | 65 <sup>[36]</sup> | 44 <sup>[24]</sup>   | 40 <sup>b</sup>      | 62 <sup>[36]</sup> | 63 <sup>[34]</sup> |                   |                    | 82 <sup>[49]</sup> | 47 <sup>[37]</sup> | 19 <sup>f</sup>    | 38 <sup>[36]</sup>    | 68 <sup>[32]</sup> |
| 2004/2005 | 52 <sup>[45]</sup>                           | 72 <sup>[17]</sup> | 64 <sup>[19]</sup> | 52 <sup>[24]</sup>   | 39 <sup>b</sup>      | 61 <sup>[36]</sup> | 67 <sup>[34]</sup> |                   |                    | 82 <sup>[49]</sup> | 39 <sup>[37]</sup> | 17 <sup>f</sup>    | 23 <sup>[36]</sup>    | 69 <sup>[32]</sup> |
| 2005/2006 | 55 <sup>[45]</sup>                           | 75 <sup>[17]</sup> | 63 <sup>[19]</sup> | 59 <sup>[24]</sup>   | 38 <sup>b</sup>      | 63 <sup>[36]</sup> | 68 <sup>[34]</sup> |                   | 2 <sup>e</sup>     | 84 <sup>[49]</sup> | 42 <sup>[37]</sup> | 18 <sup>f</sup>    | 29 <sup>[36]</sup>    | 70 <sup>[32]</sup> |
| 2006/2007 | 54 <sup>[45]</sup>                           | 74 <sup>[17]</sup> | 63 <sup>[19]</sup> | 50 <sup>[19]</sup>   | 34 <sup>b</sup>      | 61 <sup>[36]</sup> | 67 <sup>[34]</sup> | 2 <sup>d</sup>    | 2 <sup>e</sup>     | 82 <sup>[49]</sup> | 50 <sup>[37]</sup> | 17 <sup>f</sup>    | 26 <sup>[36]</sup>    | 68 <sup>[32]</sup> |
| 2007/2008 | 54 <sup>[45]</sup>                           | 74 <sup>[17]</sup> | 64 <sup>[36]</sup> | 57 <sup>[21]</sup>   | 35 <sup>b</sup>      | 62 <sup>[36]</sup> | 65 <sup>[34]</sup> | 2 <sup>d</sup>    | 13 <sup>e</sup>    | 82 <sup>[49]</sup> | 51 <sup>[37]</sup> | 53 <sup>f,g</sup>  | 33 <sup>[36]</sup>    | 63 <sup>[32]</sup> |
| 2008/2009 | 54 <sup>[13]</sup>                           | 74 <sup>[13]</sup> | 65 <sup>[26]</sup> | 55 <sup>[13]</sup>   | 38 <sup>[13]</sup>   | 70 <sup>[13]</sup> | 66 <sup>[34]</sup> | 2 <sup>[13]</sup> | 24 <sup>e</sup>    | 83 <sup>[48]</sup> | 53 <sup>[37]</sup> | 49 <sup>[13]</sup> | 36 <sup>[36]</sup>    | 65 <sup>[32]</sup> |
| 2009/2010 | 50 <sup>[43]</sup>                           | 72 <sup>[13]</sup> | 64 <sup>[26]</sup> | 48 <sup>[13]</sup>   | 32 <sup>[13]</sup>   | 54 <sup>[13]</sup> | 66 <sup>[34]</sup> | 2 <sup>[13]</sup> | 22 <sup>e</sup>    | 81 <sup>[48]</sup> | 52 <sup>[37]</sup> | 29 <sup>[13]</sup> | 31 <sup>[36]</sup>    | 66 <sup>[13]</sup> |
| 2010/2011 | 47 <sup>[43]</sup>                           | 73 <sup>[14]</sup> | 56 <sup>[26]</sup> | 51 <sup>[14]</sup>   | 30 <sup>[14]</sup>   | 60 <sup>[14]</sup> | 60 <sup>[34]</sup> | 2 <sup>[14]</sup> | 17 <sup>e</sup>    | 81 <sup>[48]</sup> | 48 <sup>[37]</sup> | 19 <sup>[14]</sup> | 24 <sup>[36]</sup>    | 57 <sup>[14]</sup> |
| 2011/2012 | 48 <sup>[43]</sup>                           | 74 <sup>[15]</sup> | 55 <sup>[26]</sup> | 42 <sup>[42]</sup>   | 31 <sup>[15]</sup>   | 56 <sup>[15]</sup> | 63 <sup>[34]</sup> | 2 <sup>[15]</sup> | 19 <sup>[15]</sup> | 77 <sup>[48]</sup> | 43 <sup>[15]</sup> | 21 <sup>[15]</sup> | 22 <sup>[36]</sup>    | 58 <sup>[15]</sup> |
| 2012/2013 | 45 <sup>[43]</sup>                           | 73 <sup>[17]</sup> | 53 <sup>[26]</sup> | 37 <sup>[42]</sup>   | 31 <sup>b</sup>      | 57 <sup>c</sup>    | 54 <sup>[34]</sup> | 2 <sup>d</sup>    | 19 <sup>e</sup>    | 74 <sup>[48]</sup> | 55 <sup>[44]</sup> | 15 <sup>f</sup>    | 15 <sup>[39]</sup>    | 57 <sup>[32]</sup> |
| 2013/2014 | 47 <sup>[43]</sup>                           | 73 <sup>[18]</sup> | 52 <sup>[26]</sup> |                      | 29 <sup>b</sup>      | 59 <sup>(27)</sup> | 55 <sup>[34]</sup> | 3 <sup>d</sup>    |                    | 72 <sup>[48]</sup> | 50 <sup>[35]</sup> |                    | 16 <sup>[40]</sup>    | 56 <sup>[32]</sup> |
| 2014/2015 | 45 <sup>[43]</sup>                           | 73 <sup>[41]</sup> | 48 <sup>[26]</sup> |                      | 27 <sup>b</sup>      |                    |                    |                   |                    |                    |                    |                    | 14 <sup>[38]</sup>    | 56 <sup>[32]</sup> |

<sup>a</sup> Vaccination coverage of the elderly population measured for age  $\geq 60$  years instead of age  $\geq 65$  years

<sup>b</sup> Personal communication with Dr. Z.Mòlnar (30 May 2014)

<sup>c</sup> Personal communication with Dr. S. Cotter (26 May 2014)

<sup>d</sup> Personal communication with Dr. R. Nikiforova (27 August 2014)

<sup>e</sup> Personal communication with Dr. E. Orechoviene (27 August 2014)

<sup>f</sup> Personal communication with Dr. H. Hudecová (26 May 2014)

<sup>g</sup> Active promotion of the influenza vaccine by National Influenza Centre of Romania (personal communication with Dr. V. Alexandrescu (20 February 2015))
