# Supplementary material for: Long-Term Correlation between Influenza Vaccination Coverage and Incidence of Influenza-Like Illness in 14 European Countries
Source: PubMed Central journal article supplement (PMC5042488; doi:10.1371/journal.pone.0163508), 2016-09-29
Supplement: pone.0163508.s004.pdf [file pone.0163508.s004.pdf]

**S4 Table.** Overview data ILI samples and percentage influenza positivity for the total population in 11 European countries

| Season        |                                   | Germany | France | Hungary | Italy | Latvia | Lithuania | The Netherlands | Portugal | Romania | Slovakia | Spain |
|---------------|-----------------------------------|---------|--------|---------|-------|--------|-----------|-----------------|----------|---------|----------|-------|
| 1996/1997     | % Influenza positive <sup>a</sup> |         |        |         |       |        |           | 28.0            |          |         |          |       |
|               | ∑ Samples                         |         |        |         |       |        |           | 454             |          |         |          |       |
|               | ∑ Influenza cases                 |         |        |         |       |        |           | 127             |          |         |          |       |
|               | No samples reported               |         |        |         |       |        |           | 1               |          |         |          |       |
|               | Missing weeks                     |         |        |         |       |        |           | 4               |          |         |          |       |
| Total missing |                                   |         |        |         |       |        | 5         |                 |          |         |          |       |
| 1997/1998     | % Influenza positive <sup>a</sup> |         |        |         |       |        |           | 24.2            |          |         |          |       |
|               | ∑ Samples                         |         |        |         |       |        |           | 343             |          |         |          |       |
|               | ∑ Influenza cases                 |         |        |         |       |        |           | 83              |          |         |          |       |
|               | No samples reported               |         |        |         |       |        |           | 1               |          |         |          |       |
|               | Missing weeks                     |         |        |         |       |        |           | -               |          |         |          |       |
| Total missing |                                   |         |        |         |       |        | 1         |                 |          |         |          |       |
| 1998/1999     | % Influenza positive <sup>a</sup> |         |        |         |       |        |           | 24.4            |          |         |          |       |
|               | ∑ Samples                         |         |        |         |       |        |           | 414             |          |         |          |       |
|               | ∑ Influenza cases                 |         |        |         |       |        |           | 101             |          |         |          |       |
|               | No samples reported               |         |        |         |       |        |           | -               |          |         |          |       |
|               | Missing weeks                     |         |        |         |       |        |           | 3               |          |         |          |       |
| Total missing |                                   |         |        |         |       |        | 3         |                 |          |         |          |       |
| 1999/2000     | % Influenza positive <sup>a</sup> |         |        |         | 22.8  |        |           | 28.5            |          |         |          |       |
|               | ∑ Samples                         |         |        |         | 988   |        |           | 284             |          |         |          |       |
|               | ∑ Influenza cases                 |         |        |         | 225   |        |           | 81              |          |         |          |       |
|               | No samples reported               |         |        |         | -     |        |           | 3               |          |         |          |       |
|               | Missing weeks                     |         |        |         | 18    |        |           | -               |          |         |          |       |
| Total missing |                                   |         |        | 18      |       |        | 3         |                 |          |         |          |       |
| 2000/2001     | % Influenza positive <sup>a</sup> |         |        |         | 13.6  |        |           | 21.2            |          |         |          |       |
|               | ∑ Samples                         |         |        |         | 81    |        |           | 66              |          |         |          |       |
|               | ∑ Influenza cases                 |         |        |         | 11    |        |           | 14              |          |         |          |       |
|               | No samples reported               |         |        |         | 6     |        |           | 7               |          |         |          |       |
|               | Missing weeks                     |         |        |         | 11    |        |           | 1               |          |         |          |       |

|           |                                   |      |      |     |      |      |      |      |      |      |      |      |
|-----------|-----------------------------------|------|------|-----|------|------|------|------|------|------|------|------|
|           | Total missing                     |      |      |     | 17   |      |      | 8    |      |      |      |      |
| 2001/2002 | % Influenza positive <sup>a</sup> | 24.3 | 25.8 |     | 20.8 |      |      | 61.8 | 57.7 |      |      |      |
|           | ∑ Samples                         | 3215 | 3658 |     | 48   |      |      | 55   | 246  |      |      |      |
|           | ∑ Influenza cases                 | 780  | 944  |     | 10   |      |      | 34   | 142  |      |      |      |
|           | No samples reported               | 5    | -    |     | 5    |      |      | 6    | 4    |      |      |      |
|           | Missing weeks                     | -    | 5    |     | 11   |      |      | 10   | 7    |      |      |      |
|           | Total missing                     | 5    | 5    |     | 16   |      |      | 16   | 11   |      |      |      |
| 2002/2003 | % Influenza positive <sup>a</sup> | 46.4 | 18.8 |     | 16.1 |      |      | 26.8 | 24.3 |      |      | 25.1 |
|           | ∑ Samples                         | 4623 | 4404 |     | 56   |      |      | 56   | 152  |      |      | 1302 |
|           | ∑ Influenza cases                 | 2145 | 827  |     | 9    |      |      | 15   | 37   |      |      | 327  |
|           | No samples reported               | 2    | -    |     | 10   |      |      | 8    | 2    |      |      | 1    |
|           | Missing weeks                     | 6    | 2    |     | 8    |      |      | -    | 1    |      |      | 1    |
|           | Total missing                     | 8    | 2    |     | 18   |      |      | 8    | 3    |      |      | 2    |
| 2003/2004 | % Influenza positive <sup>a</sup> | 19.9 | 28.1 |     | 13.7 | 46.7 |      | 30.4 | 57.4 |      |      | 24.0 |
|           | ∑ Samples                         | 2785 | 3878 |     | 2882 | 105  |      | 112  | 272  |      |      | 1264 |
|           | ∑ Influenza cases                 | 553  | 1091 |     | 395  | 49   |      | 34   | 156  |      |      | 303  |
|           | No samples reported               | 3    | -    |     | -    | 19   |      | 6    | 4    |      |      |      |
|           | Missing weeks                     | 1    | 2    |     | 9    | 3    |      | -    | -    |      |      |      |
|           | Total missing                     | 4    | 2    |     | 9    | 22   |      | 6    | 4    |      |      |      |
| 2004/2005 | % Influenza positive <sup>a</sup> | 31.5 | 27.9 |     | 30.9 | 17.1 |      | 44.3 | 54.4 | 19.7 |      | 41.3 |
|           | ∑ Samples                         | 4217 | 4836 |     | 2840 | 88   |      | 158  | 349  | 854  |      | 1696 |
|           | ∑ Influenza cases                 | 1329 | 1351 |     | 878  | 55   |      | 70   | 190  | 168  |      | 701  |
|           | No samples reported               | -    | -    |     | 1    | 9    |      | 9    | 6    | 5    |      |      |
|           | Missing weeks                     | 4    | 3    |     | 8    | -    |      | -    | -    | 1    |      |      |
|           | Total missing                     | 4    | 3    |     | 9    | 9    |      | 9    | 6    | 6    |      |      |
| 2005/2006 | % Influenza positive <sup>a</sup> | 32.5 | 18.6 |     | 9.6  | 39.7 | 13.3 | 32.4 | 27.0 | 10.1 |      | 32.3 |
|           | ∑ Samples                         | 2041 | 4427 |     | 2279 | 63   | 83   | 306  | 159  | 755  |      | 1401 |
|           | ∑ Influenza cases                 | 663  | 824  |     | 218  | 25   | 11   | 99   | 43   | 76   |      | 452  |
|           | No samples reported               | -    | 1    |     | 2    | 13   | 20   | 3    | 3    | 1    |      |      |
|           | Missing weeks                     | 1    | 2    |     | 6    | 1    | 3    |      | -    | 1    |      |      |
|           | Total missing                     | 1    | 3    |     | 8    | 14   | 23   | 3    | 3    | 2    |      |      |
| 2006/2007 | % Influenza positive <sup>a</sup> | 45.9 | 22.5 | 6.8 | 37.7 | 55.1 | 12.3 | 24.3 | 47.3 | 26.8 | 36.4 | 44.8 |
|           | ∑ Samples                         | 2849 | 4192 | 293 | 1333 | 69   | 155  | 301  | 188  | 795  | 206  | 1855 |
|           | ∑ Influenza cases                 | 1307 | 943  | 20  | 503  | 38   | 19   | 73   | 89   | 213  | 75   | 825  |

|           |                                   |      |      |      |      |      |      |      |      |      |      |      |
|-----------|-----------------------------------|------|------|------|------|------|------|------|------|------|------|------|
|           | No samples reported               | -    | -    | 1    | 4    | 19   | 19   | 1    | 6    | 6    | 10   |      |
|           | Missing weeks                     | -    | 3    | 3    | 5    | 1    | -    | 1    | -    | -    | 2    |      |
|           | Total missing                     | -    | 3    | 4    | 9    | 20   | 19   |      | 6    | 6    | 12   |      |
| 2007/2008 | % Influenza positive <sup>a</sup> | 45.1 | 27.4 | 33.6 | 14.9 | 62.5 | 23.4 | 29.6 | 45.7 | 46.0 | 50.5 | 49.1 |
|           | ∑ Samples                         | 2492 | 5019 | 432  | 859  | 24   | 111  | 483  | 116  | 1011 | 220  | 2019 |
|           | ∑ Influenza cases                 | 1125 | 1376 | 145  | 128  | 15   | 26   | 143  | 53   | 465  | 111  | 992  |
|           | No samples reported               | -    | -    | 1    | 4    | 17   | 12   |      | 5    | 2    | 3    |      |
|           | Missing weeks                     | -    | -    | -    | 9    | 7    | -    |      | -    | 5    | -    |      |
|           | Total missing                     | -    | -    | 1    | 13   | 24   | 12   |      | 5    | 7    | 3    |      |
| 2008/2009 | % Influenza positive <sup>a</sup> | 51.7 | 34.1 | 20.3 | 40.8 | 51.2 | 38.2 | 30.1 | 48.0 | 36.9 | 40.5 | 42.9 |
|           | ∑ Samples                         | 3277 | 4799 | 1017 | 1284 | 82   | 136  | 568  | 319  | 1156 | 227  | 2507 |
|           | ∑ Influenza cases                 | 1694 | 1638 | 206  | 524  | 42   | 52   | 171  | 153  | 427  | 92   | 1075 |
|           | No samples reported               | -    | 1    | -    | 5    | 17   | 11   |      | 1    | 4    | 7    |      |
|           | Missing weeks                     | -    | 2    | -    | 6    | -    | -    |      | 1    | -    | -    |      |
|           | Total missing                     | -    | 3    | -    | 11   | 17   | 11   |      | 2    | 4    | 7    |      |
| 2009/2010 | % Influenza positive <sup>a</sup> | 38.2 | 35.3 | 20.7 | 23.1 | 23.9 | 52.0 | 30.7 | 38.8 | 34.6 | 24.3 | 45.4 |
|           | ∑ Samples                         | 2315 | 8949 | 1850 | 744  | 67   | 221  | 925  | 366  | 1805 | 111  | 8179 |
|           | ∑ Influenza cases                 | 885  | 3155 | 382  | 172  | 16   | 115  | 284  | 142  | 624  | 27   | 3714 |
|           | No samples reported               | -    | -    | -    | 6    | 27   | 2    |      | 8    | 3    | 6    |      |
|           | Missing weeks                     | 2    | -    | -    | 2    | -    | 4    |      | -    | -    | 7    |      |
|           | Total missing                     | -    | -    | -    | 8    | 27   | 6    |      | 8    | 3    | 13   |      |
| 2010/2011 | % Influenza positive <sup>a</sup> | 49.5 | 36.4 | 13.9 | 37.5 | 50.5 | 44.6 | 40.0 | 39.7 | 28.2 | 41.7 | 44.9 |
|           | ∑ Samples                         | 2810 | 5295 | 1948 | 1524 | 101  | 269  | 633  | 136  | 893  | 187  | 5482 |
|           | ∑ Influenza cases                 | 1391 | 1929 | 270  | 571  | 51   | 120  | 253  | 54   | 252  | 78   | 2463 |
|           | No samples reported               | -    | -    | 1    | -    | 24   | 9    |      | 10   |      | 4    |      |
|           | Missing weeks                     | -    | -    | -    | 9    | -    | -    |      |      |      | 2    |      |
|           | Total missing                     | -    | -    | 1    | 9    | 24   | 9    |      |      |      | 6    |      |
| 2011/2012 | % Influenza positive <sup>a</sup> | 23.3 | 34.7 | 29.9 | 49.8 | 45.2 | 28.9 | 19.4 | 31.6 | 27.4 | 33.3 | 50.0 |
|           | ∑ Samples                         | 1692 | 4829 | 1053 | 1579 | 62   | 104  | 387  | 155  | 668  | 135  | 5858 |
|           | ∑ Influenza cases                 | 394  | 1676 | 315  | 786  | 28   | 30   | 75   | 49   | 183  | 45   | 2928 |
|           | No samples reported               | -    | -    | 1    | 1    | 20   | 11   |      | 10   |      | 6    |      |
|           | Missing weeks                     | -    | -    | -    | 9    | -    | -    |      | -    |      | 1    |      |
|           | Total missing                     | -    | -    | 1    | 10   | 20   | 11   |      | 10   |      | 7    |      |
| 2012/2013 | % Influenza positive <sup>a</sup> | 47.5 |      | 28.7 | 54.2 | 58.5 | 71.7 | 33.2 | 34.6 | 27.8 | 42.1 | 51.4 |

|           |                                   |      |  |      |      |      |     |      |      |     |      |      |
|-----------|-----------------------------------|------|--|------|------|------|-----|------|------|-----|------|------|
|           | ∑ Samples                         | 3868 |  | 696  | 1296 | 65   | 537 | 695  | 497  | 454 | 278  | 5173 |
|           | ∑ Influenza cases                 | 1836 |  | 200  | 702  | 38   | 385 | 231  | 172  | 126 | 117  | 2660 |
|           | No samples reported               | -    |  | 4    | 1    | 19   | 2   |      | 2    | 3   | 9    |      |
|           | Missing weeks                     | -    |  | 1    | 9    | -    | -   |      | -    | -   | 1    |      |
|           | Total missing                     | -    |  | 5    | 10   | 19   | 2   |      | 2    | 3   | 10   |      |
| 2013/2014 | % Influenza positive <sup>a</sup> |      |  | 15.4 | 30.2 | 75.0 |     | 15.0 | 53.0 |     | 21.7 |      |
|           | ∑ Samples                         |      |  | 663  | 985  | 4    |     | 340  | 249  |     | 120  |      |
|           | ∑ Influenza cases                 |      |  | 102  | 297  | 3    |     | 51   | 132  |     | 26   |      |
|           | No samples reported               |      |  | 4    | -    | 29   |     |      | 10   |     | 6    |      |
|           | Missing weeks                     |      |  | 2    | 9    | -    |     |      | -    |     | 1    |      |
|           | Total missing                     |      |  | 6    | 9    | 29   |     |      | 10   |     | 7    |      |

<sup>a</sup> % Influenza positivity = (∑ Influenza cases / ∑ Specimen) \* 100
